# Supplementary material
Source: PubMed Central journal article supplement (PMC4177295)
Supplement: NIHMS612653-supplement-01.pdf [file NIHMS612653-supplement-01.pdf]

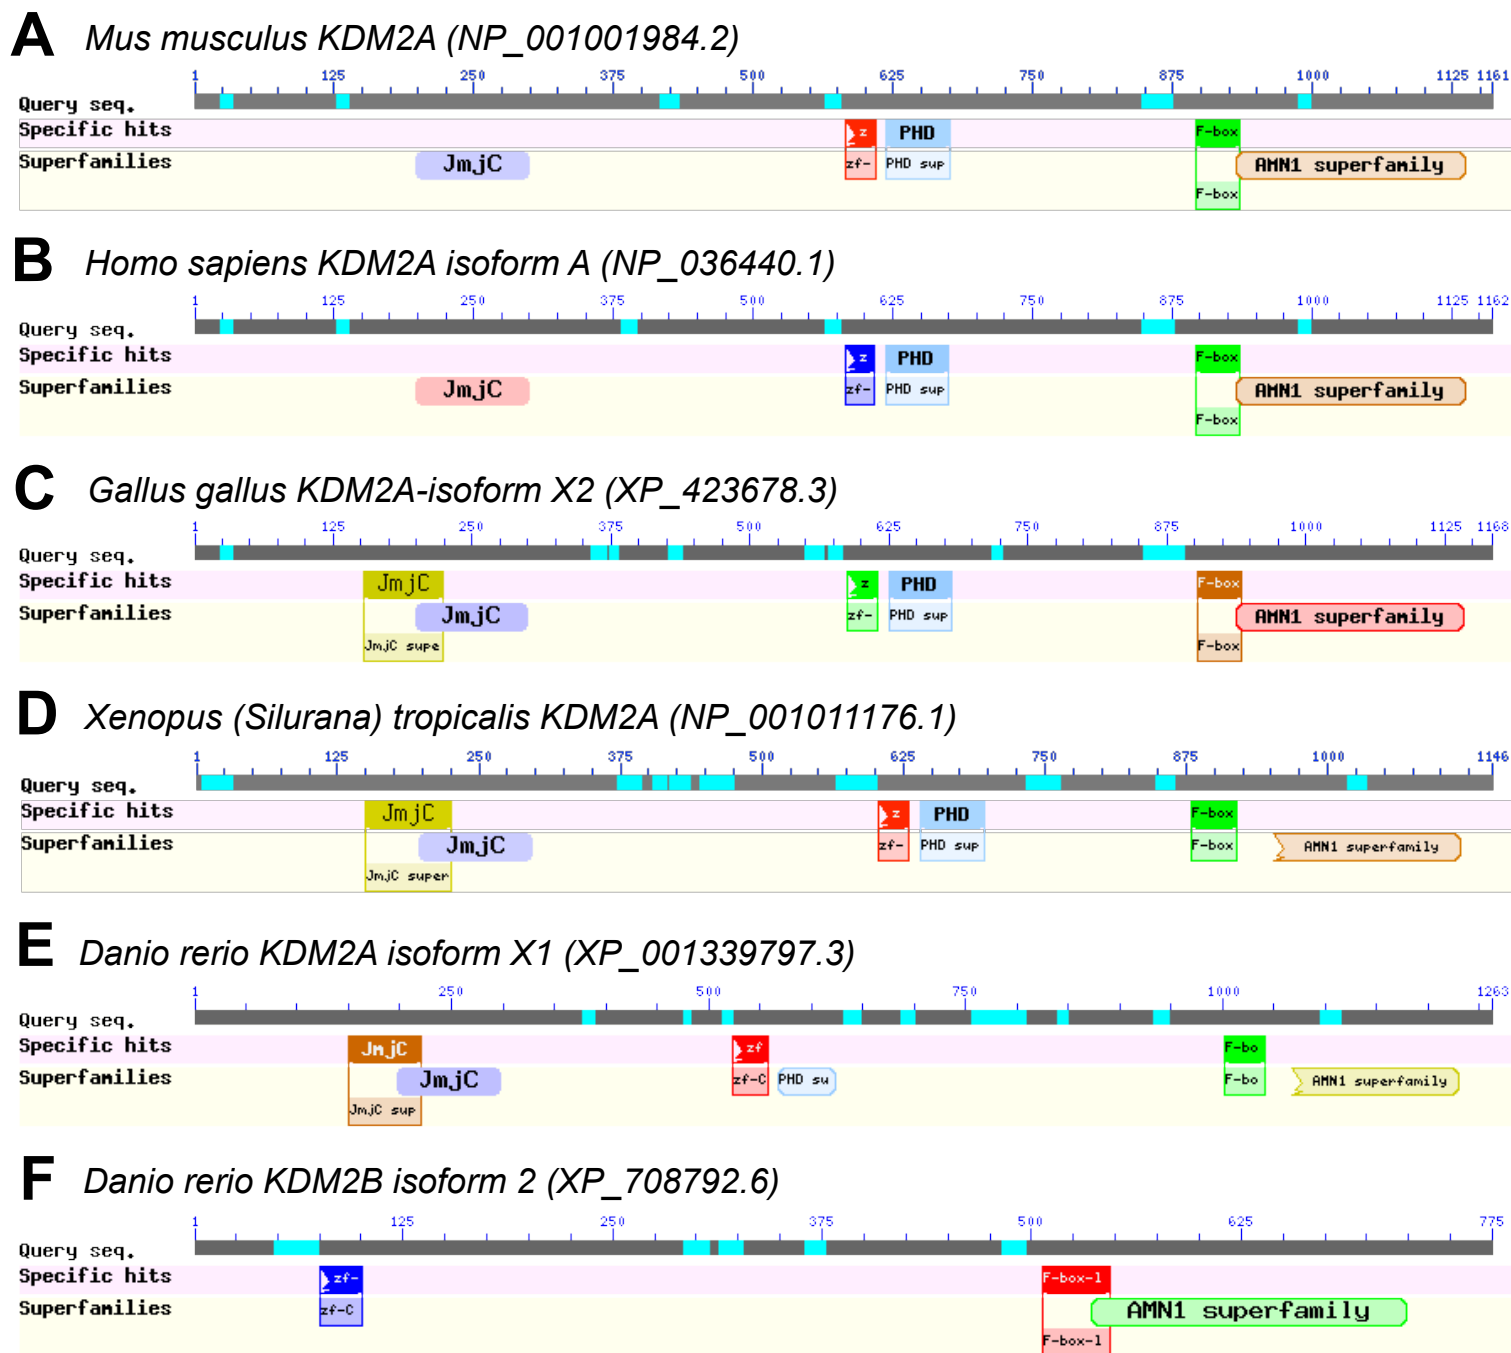

**Fig. S1**

**G** *Xenopus laevis* KDM2B (NP\_001085840.1)

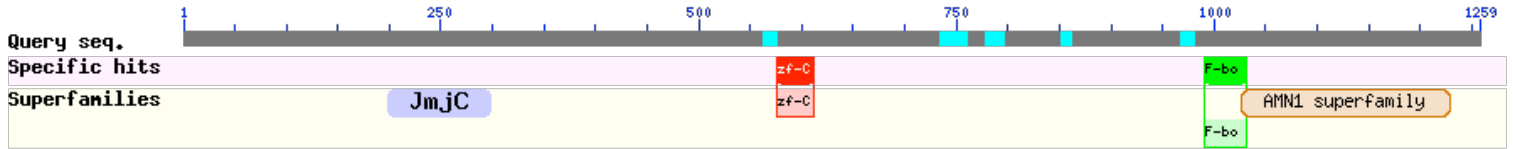

**H** *Gallus gallus* KDM2B isoform X25 (XP\_004945621.1)

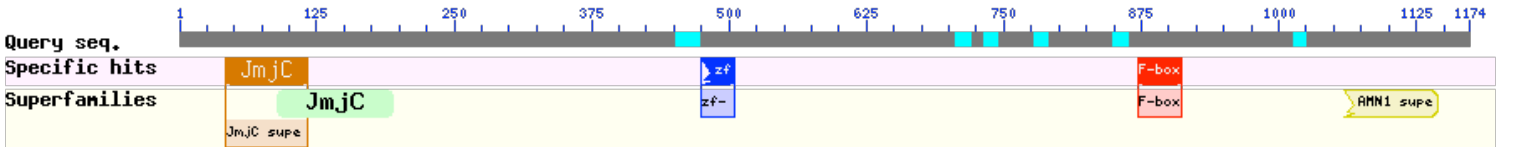

**I** *Mus musculus* KDM2B isoform 1 (NP\_001003953.1)

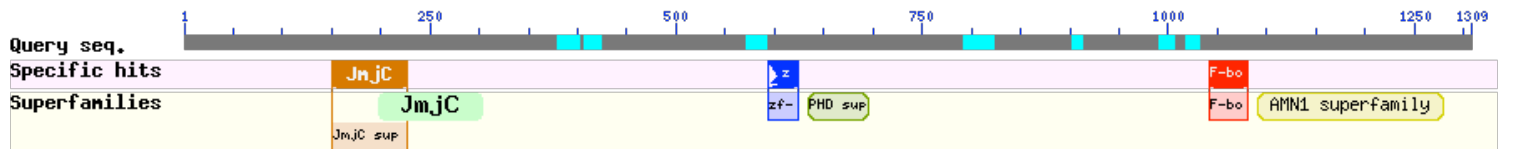

**J** *Homo sapiens* KDM2B isoform A (NP\_115979.3)

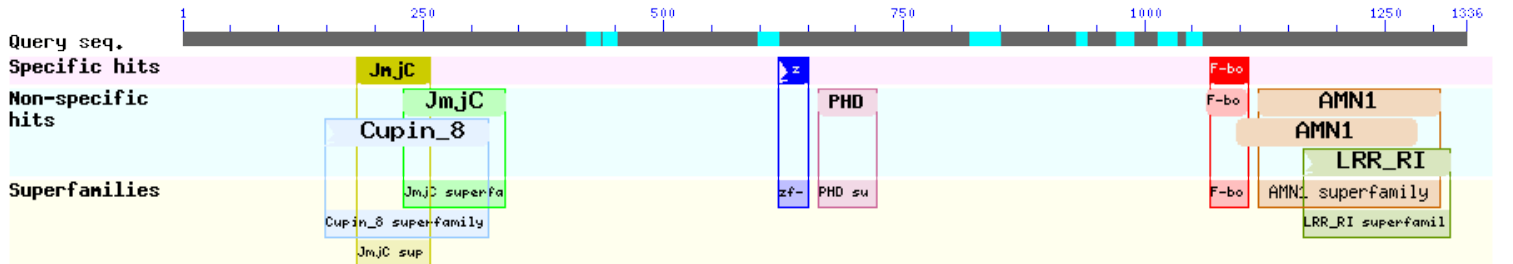

**K** *Ciona intestinalis* KDM2 (XP\_423678.3)

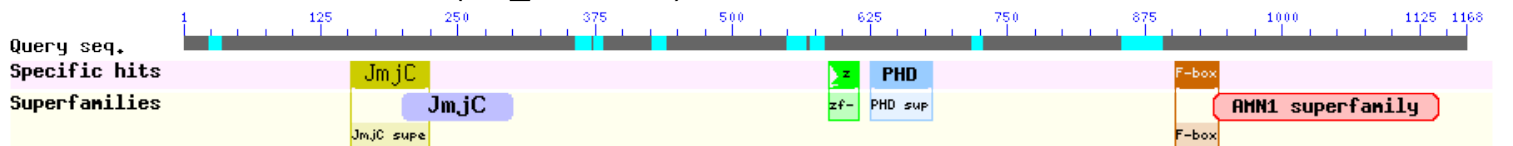

**Fig. S1 (cont.)**

**L** *Strongylocentrotus purpuratus* KDM2B-like (XP\_780290.3)

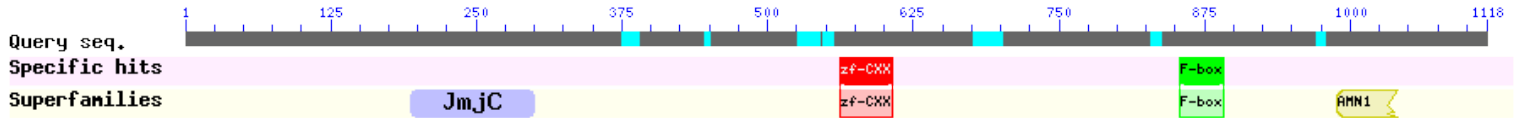

**M** *Strongylocentrotus purpuratus* KDM2A-like (XP\_003731780.1)

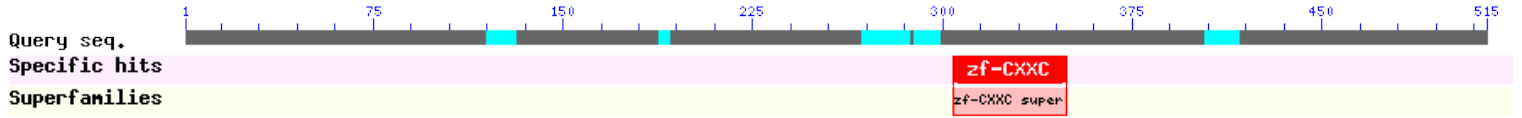

**N** *Tribolium castaneum* hypothetical protein TcasGA2\_TC015153 (EFA05058.1)

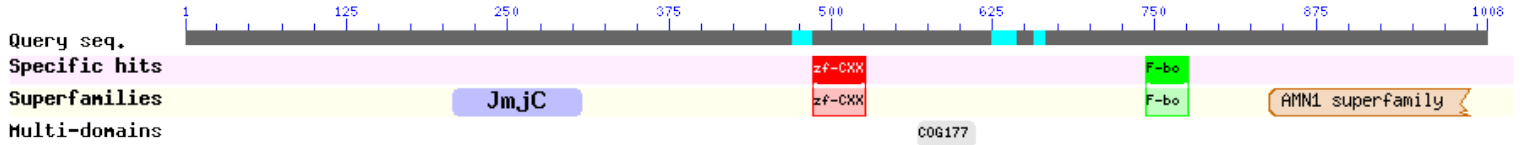

**O** *Anopheles gambiae* KDM2 (XP\_321169.5)

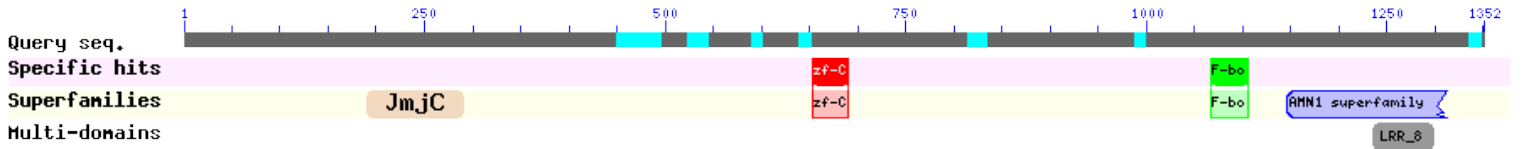

**P** *Drosophila melanogaster* KDM2 isoform B (AAF54335.2)

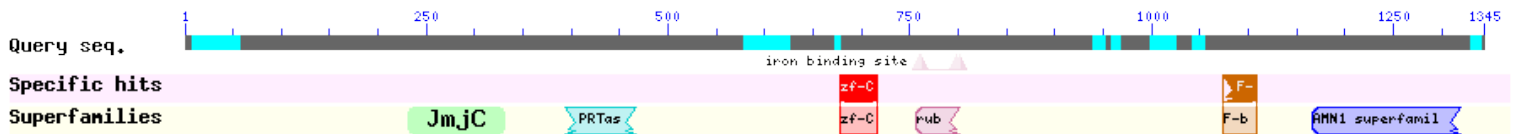

**Q** *Caenorhabditis elegans* JHDM-1, isoform b (NP\_498419)

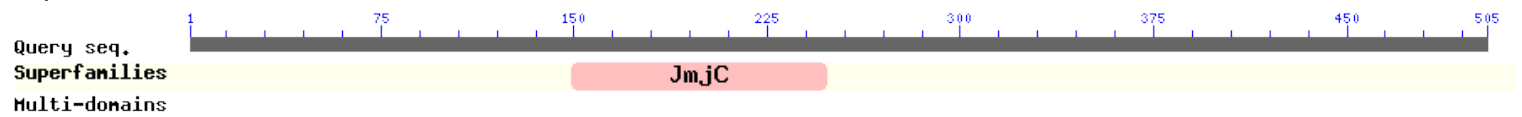

**Fig. S1 (cont.)**

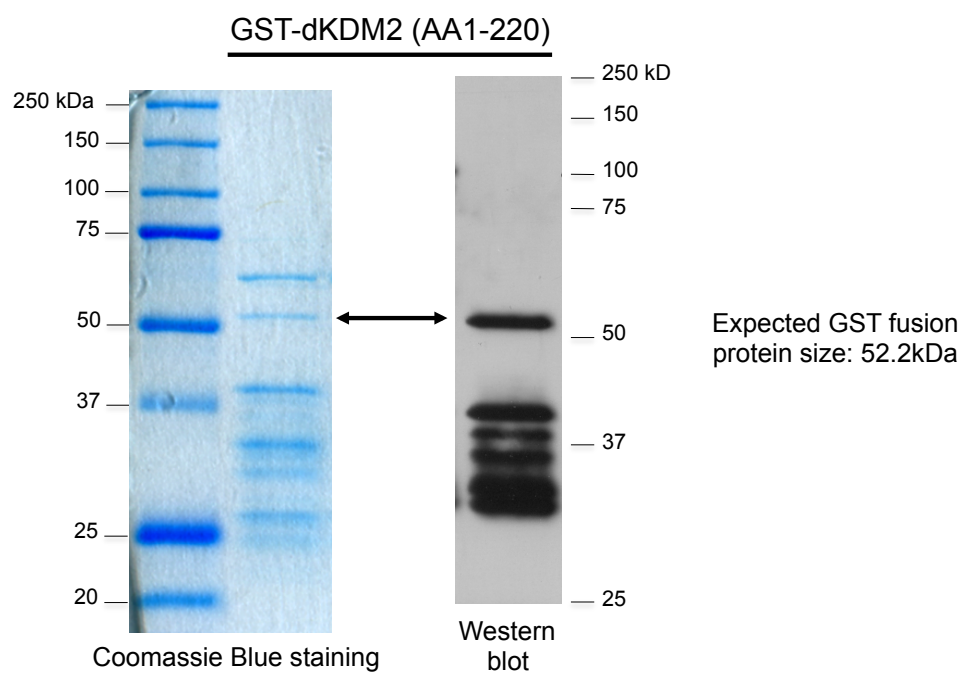

**Fig. S2**

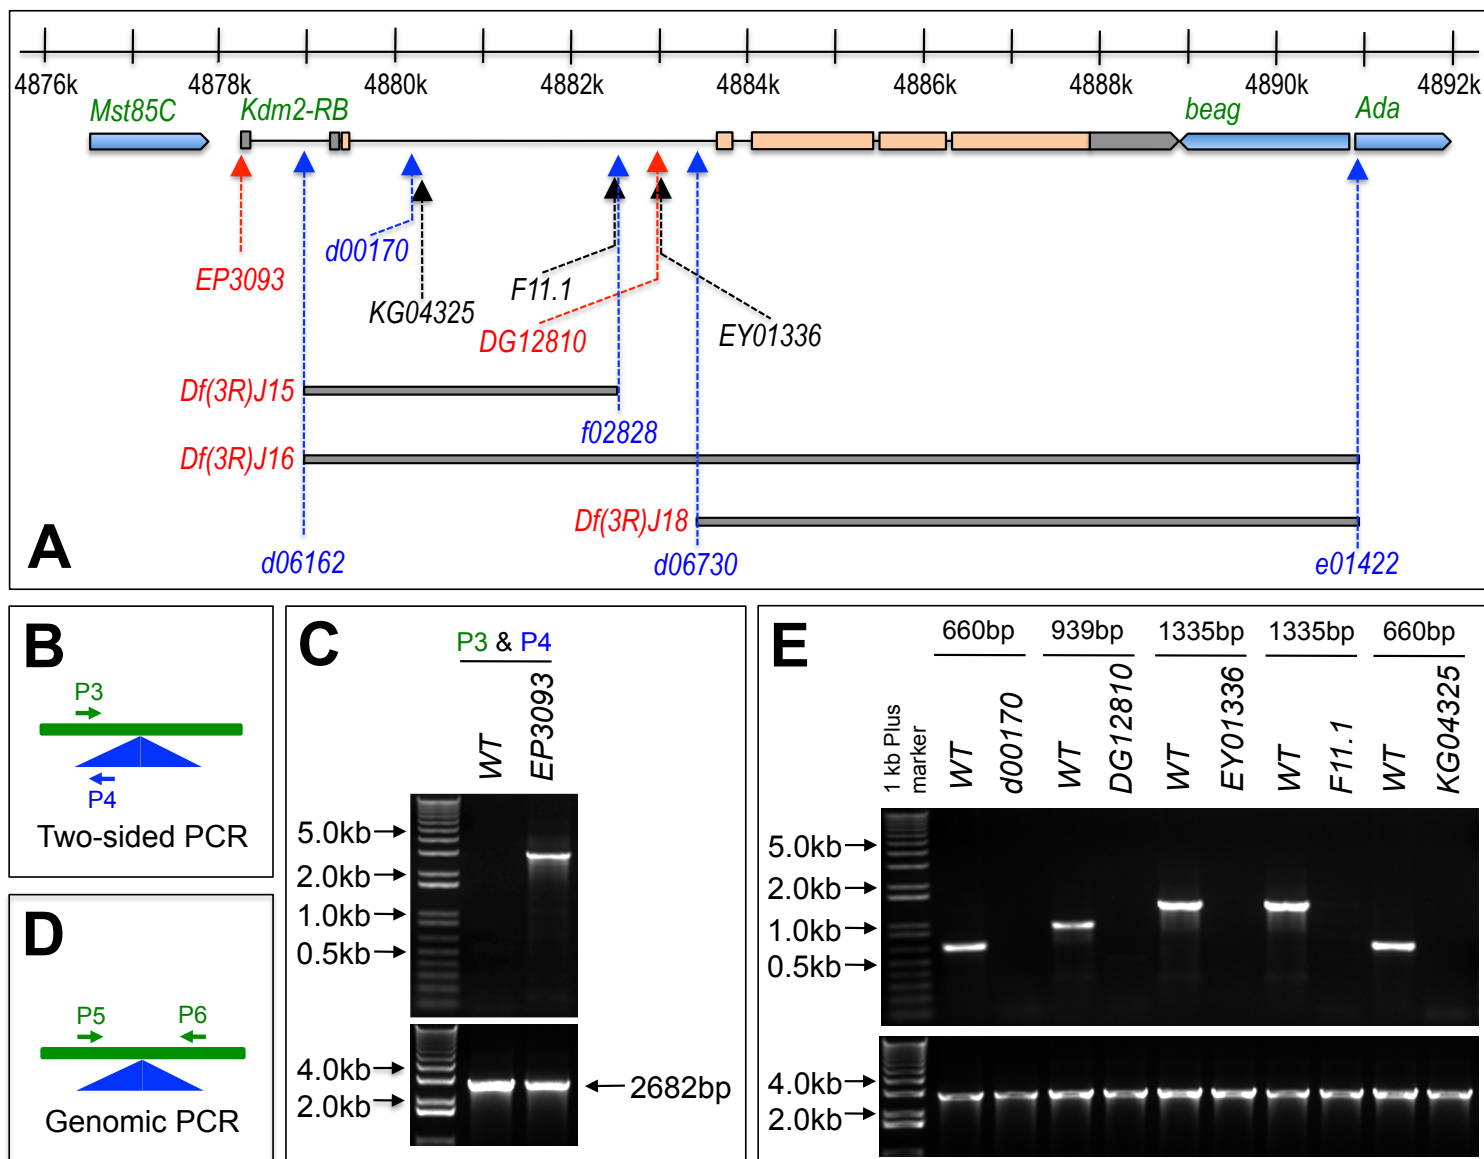

**Fig. S3**

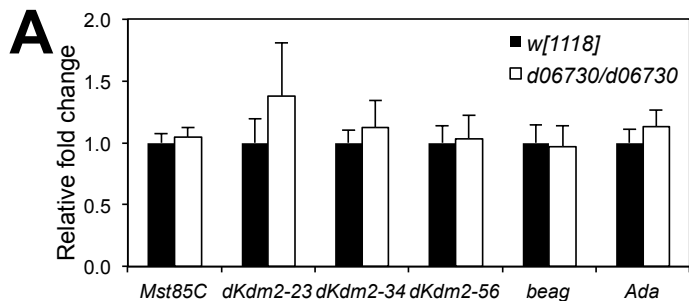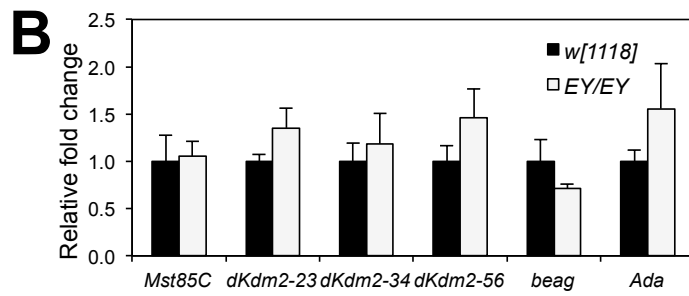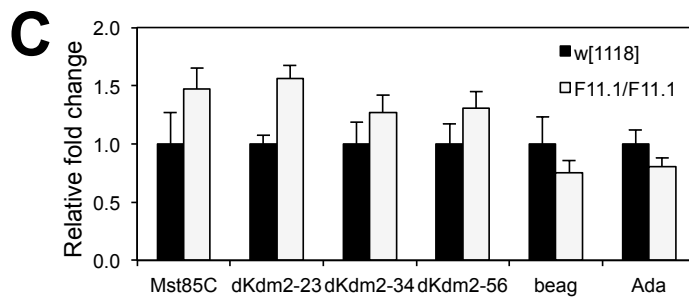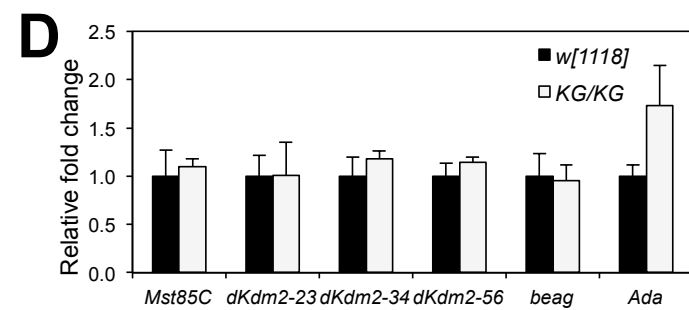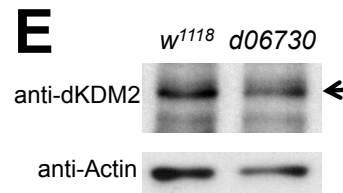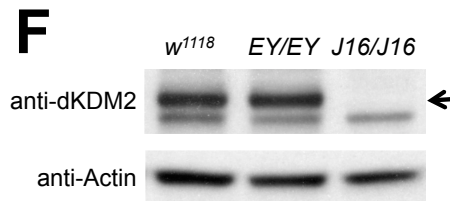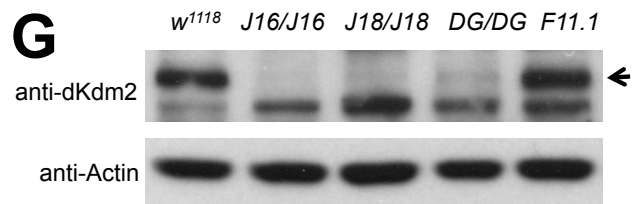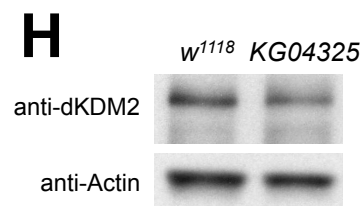

**Fig. S4**

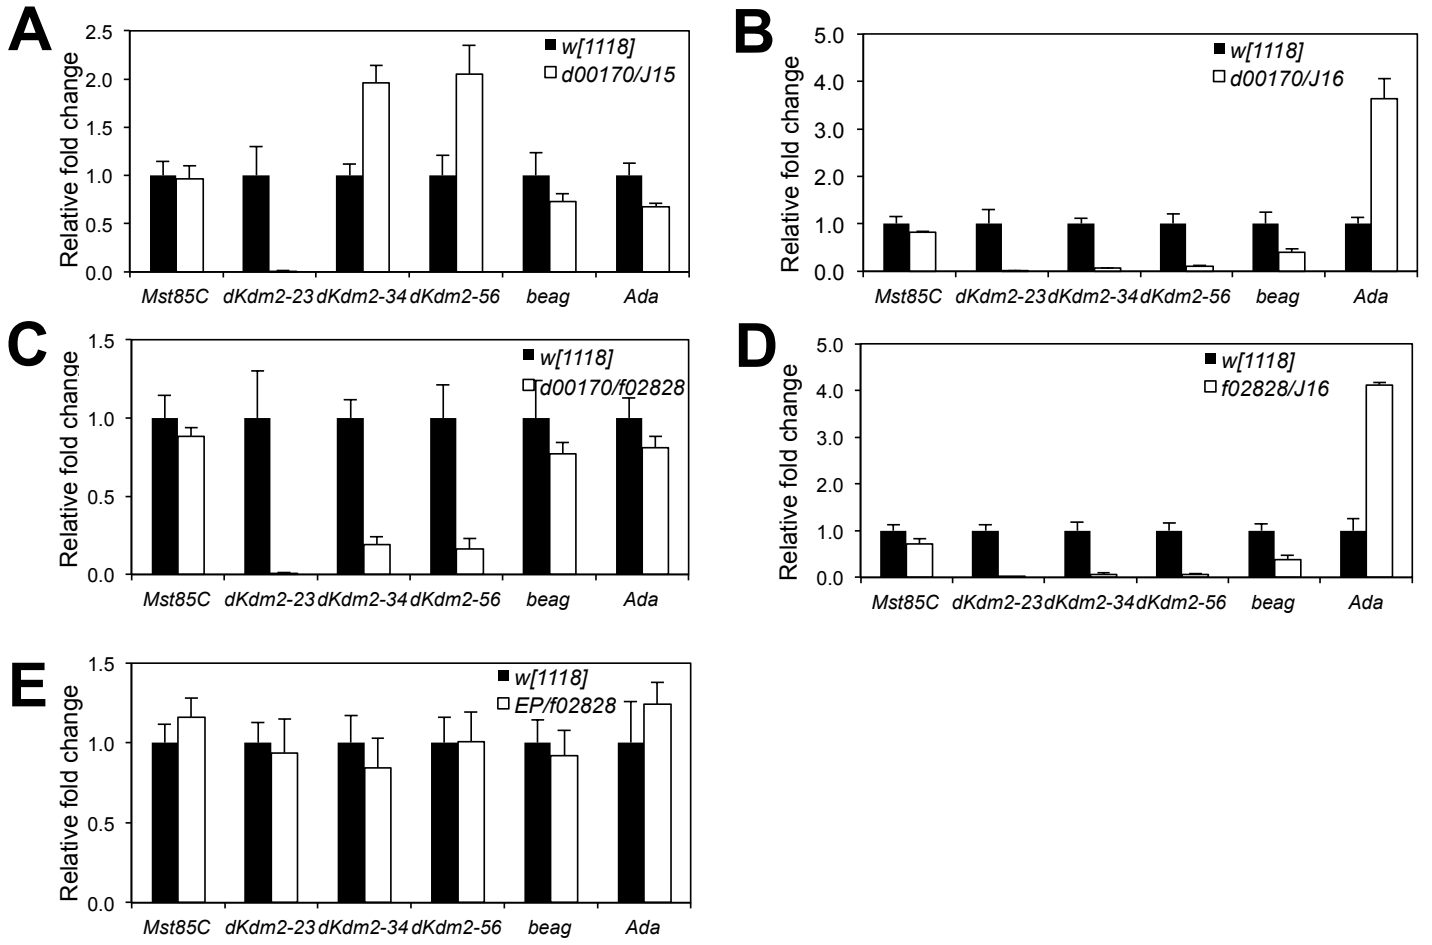

Fig. S5

**A**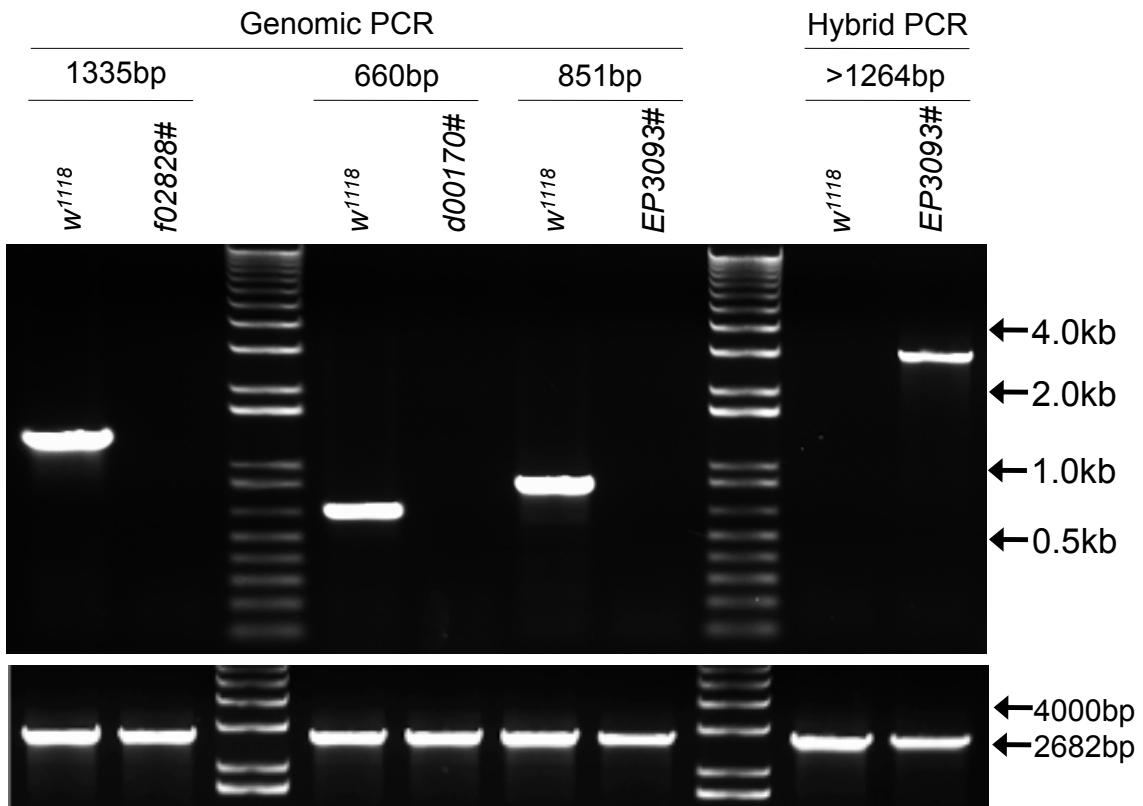**B**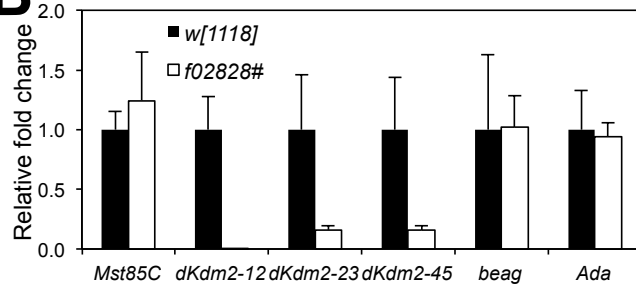**C**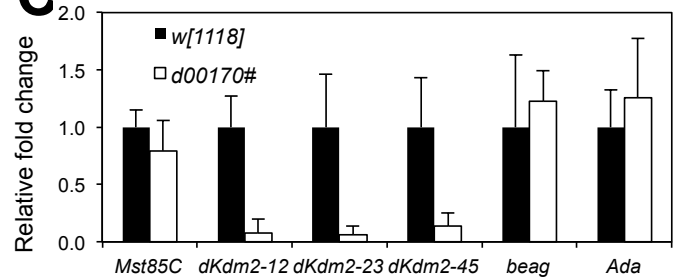**D**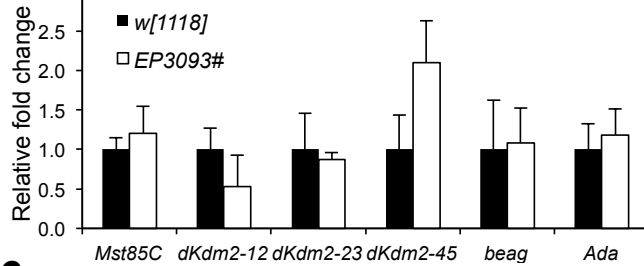**E**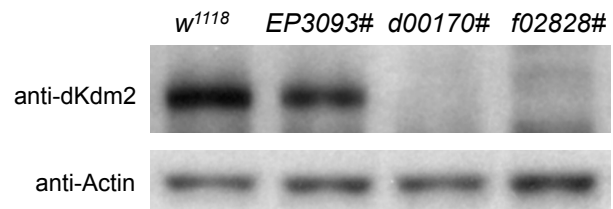**Fig. S6**
